# Supplementary material
Source: Research Square preprint supplement (doi:10.21203/rs.3.rs-9792299/v1)
Supplement: Supplementary file 1 [file 0ccb939ac52cb39a05d82cde.pdf]

| <b>Primary antibodies</b>   |                                            |                      |                       |
|-----------------------------|--------------------------------------------|----------------------|-----------------------|
| <b>Antibody</b>             | <b>Dilution</b>                            | <b>Manufacturer</b>  | <b>Catalog number</b> |
| Mouse anti-Gephyrin         | 1:500 (IF-m)                               | Synaptic Systems     | 147011                |
| Mouse anti-NeuN (clone A60) | 1:250 (IF-m)                               | Merck Millipore      | MAB377                |
| Mouse anti-Parvalbumin      | 1:300 (IF-m)                               | Synaptic Systems     | 195011                |
| Rabbit anti-AIF-1           | 1:300 (IF-m)                               | Invitrogen           | PA5-21274             |
| Rabbit anti-Calbindin       | 1:300 (IF-m)                               | Merck Millipore      | ABN2192               |
| Rabbit anti-GFAP            | 1:400 (IF-m)                               | Abcam                | Ab16997               |
| Rat anti-Somatostatin-28    | 1:300 (IF-m)                               | Synaptic Systems     | 366017                |
| Goat anti-VGLUT1            | 1:300 (IF-m); 1:1000 (WB)                  | Synaptic Systems     | 135 307               |
| Rabbit anti-PSD-95          | 1:200 (IF-m); 1:1000 (WB)                  | Abcam                | 18258                 |
| Rabbit anti-VGAT            | 1:300 (IF-m); 1:500 (IF-h);<br>1:1000 (WB) | Synaptic Systems     | 131 002               |
| Rabbit anti-Synaptophysin   | 1:1000 (WB)                                | Abcam                | 14692                 |
| Sheep anti-CDKL5            | 1:1000 (WB)                                | University of Dundee | SA145                 |

| <b>Secondary antibodies</b>            |                 |                        |                       |
|----------------------------------------|-----------------|------------------------|-----------------------|
| <b>Antibody</b>                        | <b>Dilution</b> | <b>Manufacturer</b>    | <b>Catalog number</b> |
| anti-goat Alexa Fluor 594-conjugated   | 1:200 (IF-m)    | Invitrogen             | A11058                |
| anti-mouse Alexa Fluor 555-conjugated  | 1:200 (IF-m)    | Invitrogen             | A21422                |
| anti-rabbit Alexa Fluor 488-conjugated | 1:200 (IF-m)    | Invitrogen             | A21206                |
| anti-rabbit Alexa Fluor 555-conjugated | 1:200 (IF-m)    | Invitrogen             | A21428                |
| anti-rabbit Cy3-conjugated             | 1:1000 (IF-h)   | Jackson ImmunoResearch | 711-165-152           |
| anti-rat Cy3-conjugated                | 1:200 (IF-m)    | Jackson ImmunoResearch | 112-165-143           |
| anti-goat HRP-conjugated               | 1:5000 (WB)     | Jackson ImmunoResearch | 705-035-147           |
| anti-rabbit HRP-conjugated             | 1:5000 (WB)     | Jackson ImmunoResearch | 111-035-003           |
| anti-sheep HRP-conjugated              | 1:5000 (WB)     | Jackson ImmunoResearch | 713-035-003           |

**Table S1. List of primary and secondary antibodies.** Abbreviations: IF-m = immunofluorescence in mouse brain tissue; IF-h = immunofluorescence in human brain tissue; WB = western blotting.
