# Supplementary material
Source: Research Square preprint supplement (doi:10.21203/rs.3.rs-9792299/v1)
Supplement: Supplementary file 2 [file 15f108eaaaa46602415917b3.pdf]

| Gene                                  | log <sub>2</sub> FC | StdErr | p-adj                  | Direction | Biological function                                                            |
|---------------------------------------|---------------------|--------|------------------------|-----------|--------------------------------------------------------------------------------|
| <b>Activity-dependent signaling</b>   |                     |        |                        |           |                                                                                |
| <i>Egr1</i>                           | 0.554               | 0.093  | 9.69×10 <sup>-6</sup>  | ↑         | Immediate early gene, LTP and memory consolidation                             |
| <i>Egr2</i>                           | 1.352               | 0.279  | 1.75×10 <sup>-3</sup>  | ↑         | Immediate early gene, hindbrain segmentation and development                   |
| <i>Nr4a1</i>                          | 0.666               | 0.104  | 1.30×10 <sup>-6</sup>  | ↑         | Immediate early gene, synaptic plasticity, dendritic spine regulation          |
| <i>Nr4a3</i>                          | 0.284               | 0.071  | 4.46×10 <sup>-2</sup>  | ↑         | Immediate early gene, memory formation                                         |
| <i>Bdnf</i>                           | 0.27                | 0.065  | 2.80×10 <sup>-2</sup>  | ↑         | Neurotrophic factor, synaptic maturation and plasticity                        |
| <b>Synaptic modulation</b>            |                     |        |                        |           |                                                                                |
| <i>Chrm3</i>                          | 0.304               | 0.073  | 2.80×10 <sup>-2</sup>  | ↑         | Muscarinic M3 receptor, hippocampal GABAergic modulation                       |
| <i>Sparc</i>                          | -0.341              | 0.072  | 3.15×10 <sup>-3</sup>  | ↓         | ECM glycoprotein, negative regulator of synaptogenesis                         |
| <b>Structural</b>                     |                     |        |                        |           |                                                                                |
| <i>Emp2</i>                           | -0.533              | 0.117  | 6.36×10 <sup>-3</sup>  | ↓         | Membrane protein, cell surface protein trafficking                             |
| <i>Sclt1</i>                          | -0.799              | 0.131  | 5.70×10 <sup>-6</sup>  | ↓         | Ciliogenesis and cellular structure                                            |
| <b>Vascular, metabolic and stress</b> |                     |        |                        |           |                                                                                |
| <i>Agt</i>                            | -0.581              | 0.142  | 3.38×10 <sup>-2</sup>  | ↓         | Vascular regulation                                                            |
| <i>Nos3</i>                           | -0.502              | 0.12   | 2.59×10 <sup>-2</sup>  | ↓         | Endothelial nitric oxide synthase (eNOS), vascular tone regulation             |
| <i>Tlcd3b</i>                         | -0.195              | 0.049  | 4.19×10 <sup>-2</sup>  | ↓         | Membrane lipid metabolism                                                      |
| <b>Immune response</b>                |                     |        |                        |           |                                                                                |
| <i>Gbp2b</i>                          | -5.153              | 1.016  | 7.37×10 <sup>-4</sup>  | ↓         | Interferon-induced GTPase, innate immune response                              |
| <i>Clec16a</i>                        | 0.418               | 0.07   | 9.69×10 <sup>-6</sup>  | ↑         | Autophagy and mitophagy regulation                                             |
| <b>Transcriptional regulation</b>     |                     |        |                        |           |                                                                                |
| <i>Cbfa2t3</i>                        | -0.347              | 0.065  | 2.58×10 <sup>-4</sup>  | ↓         | Transcriptional corepressor, cell differentiation                              |
| <i>Zfp366</i>                         | -0.710              | 0.168  | 2.26×10 <sup>-2</sup>  | ↓         | Transcriptional repression activity                                            |
| <i>Tiparp</i>                         | 0.467               | 0.09   | 5.06×10 <sup>-4</sup>  | ↑         | Mono-ADP-ribosyltransferase, transcriptional regulation                        |
| <i>Id4</i>                            | 0.26                | 0.064  | 3.43×10 <sup>-2</sup>  | ↑         | Transcriptional regulator, neural progenitor proliferation and differentiation |
| <b>Epilepsy / neurodevelopment</b>    |                     |        |                        |           |                                                                                |
| <i>Cdkl5</i>                          | 0.674               | 0.083  | 1.48×10 <sup>-11</sup> | ↑         | CDD causal gene                                                                |
| <b>Other / limited annotation</b>     |                     |        |                        |           |                                                                                |
| <i>Ermardl2</i>                       | 0.619               | 0.088  | 2.73×10 <sup>-8</sup>  | ↑         | Poorly characterized                                                           |
| <i>Ermardl1</i>                       | 4.554               | 0.928  | 1.40×10 <sup>-3</sup>  | ↑         | Poorly characterized                                                           |
| <i>Ddx4</i>                           | 1.021               | 0.228  | 8.08×10 <sup>-3</sup>  | ↑         | RNA helicase; germline expression                                              |
| <i>Gm5148</i>                         | -1.466              | 0.257  | 3.50×10 <sup>-5</sup>  | ↓         | Predicted gene, unknown function                                               |
| <i>Gm26881</i>                        | -2.447              | 0.546  | 8.00×10 <sup>-3</sup>  | ↓         | Predicted gene, unknown function                                               |
| <i>Gm3764</i>                         | -0.282              | 0.07   | 3.61×10 <sup>-2</sup>  | ↓         | Predicted gene, unknown function                                               |
| <i>Gm12532</i>                        | -4.139              | 1.021  | 3.61×10 <sup>-2</sup>  | ↓         | Predicted gene, unknown function                                               |
| <i>Gm36823</i>                        | -6.116              | 1.209  | 7.37×10 <sup>-4</sup>  | ↓         | Predicted gene, unknown function                                               |
| <i>Armh4</i>                          | 0.238               | 0.056  | 1.98×10 <sup>-2</sup>  | ↑         | Partially characterized; transcriptional context                               |
| <i>Nr1d1</i>                          | -0.458              | 0.097  | 2.84×10 <sup>-3</sup>  | ↓         | Circadian clock gene                                                           |

|                      |        |       |                       |   |                                   |
|----------------------|--------|-------|-----------------------|---|-----------------------------------|
| <i>Per1</i>          | 0.288  | 0.073 | $4.63 \times 10^{-2}$ | ↑ | Circadian activity-dependent gene |
| <i>Rnf38</i>         | -0.324 | 0.072 | $7.12 \times 10^{-3}$ | ↓ | E3 ubiquitin ligase               |
| <i>2210418O10Rik</i> | -1.299 | 0.321 | $3.61 \times 10^{-2}$ | ↓ | Uncharacterized gene              |
| <i>E230020A03Rik</i> | -1.255 | 0.248 | $7.37 \times 10^{-4}$ | ↓ | Uncharacterized gene              |
| <i>F730043M19Rik</i> | -0.476 | 0.084 | $3.50 \times 10^{-5}$ | ↓ | Uncharacterized gene              |
| <i>Gm43488</i>       | 0.869  | 0.219 | $4.64 \times 10^{-2}$ | ↑ | Predicted gene, unknown function  |
| <i>Junb</i>          | 0.502  | 0.116 | $1.58 \times 10^{-2}$ | ↑ | AP-1 transcription factor         |
| <i>Pisd-ps1</i>      | -1.329 | 0.267 | $1.05 \times 10^{-3}$ | ↓ | Poorly characterized              |

**Table S4. Functional classification of genes differentially expressed in the hippocampus of heterozygous *Cdk15* +/- female mice at 12 months.** Genes were identified through RNA sequencing of hippocampal tissue from wild-type and *Cdk15* +/- female mice at 12 months of age, followed by differential expression analysis using DESeq2. Log<sub>2</sub> fold change (log<sub>2</sub>FC) values and their standard error (StdErr) represent differential expression between genotypes at 12 months. Direction indicates upregulation (↑) or downregulation (↓) in heterozygous mice relative to wild-type controls. Genes are grouped by biological function. All genes with an adjusted *p*-value (*p*-adj) < 0.05 are shown. This classification highlights the convergence of increased activity-dependent signaling with reduced structural and homeostatic support pathways.
