# Supplementary material
Source: Research Square preprint supplement (doi:10.21203/rs.3.rs-9792299/v1)
Supplement: Supplementary file 3 [file 46856dcde18178a9abfc8482.pdf]

| Gene                                  | log <sub>2</sub> FC | StdErr | p-adj                  | Direction | Biological function                                                                   |
|---------------------------------------|---------------------|--------|------------------------|-----------|---------------------------------------------------------------------------------------|
| <b>Activity-dependent signaling</b>   |                     |        |                        |           |                                                                                       |
| <i>Egr1</i>                           | 0.554               | 0.111  | 1.36×10 <sup>-3</sup>  | ↑         | Immediate early gene, LTP and memory consolidation                                    |
| <i>Egr2</i>                           | 1.352               | 0.275  | 1.72×10 <sup>-3</sup>  | ↑         | Immediate early gene, hindbrain segmentation and development                          |
| <i>Nr4a1</i>                          | 0.666               | 0.147  | 7.24×10 <sup>-3</sup>  | ↑         | Immediate early gene, synaptic plasticity, dendritic spine regulation                 |
| <i>Bdnf</i>                           | 0.27                | 0.063  | 1.88×10 <sup>-2</sup>  | ↑         | Neurotrophic factor, synaptic maturation and plasticity                               |
| <b>Synaptic modulation</b>            |                     |        |                        |           |                                                                                       |
| <i>Chrm3</i>                          | 0.303               | 0.071  | 1.88×10 <sup>-2</sup>  | ↑         | Muscarinic M3 receptor, hippocampal GABAergic modulation                              |
| <i>Sntb2</i>                          | 0.228               | 0.057  | 4.77×10 <sup>-2</sup>  | ↑         | Dystrophin-associated protein complex component, inhibitory postsynaptic organization |
| <b>ECM and structural</b>             |                     |        |                        |           |                                                                                       |
| <i>Emp2</i>                           | -0.533              | 0.115  | 5.60×10 <sup>-3</sup>  | ↓         | Membrane protein, cell surface protein trafficking                                    |
| <i>Gcnt1</i>                          | -1.618              | 0.28   | 3.26×10 <sup>-5</sup>  | ↓         | Glycosylation, ECM remodeling                                                         |
| <i>Sclt1</i>                          | -0.801              | 0.139  | 3.46×10 <sup>-5</sup>  | ↓         | Ciliogenesis and cellular structure                                                   |
| <b>Vascular, metabolic and stress</b> |                     |        |                        |           |                                                                                       |
| <i>Apold1</i>                         | 0.792               | 0.194  | 3.27×10 <sup>-2</sup>  | ↑         | Vascular stress response                                                              |
| <i>Nos3</i>                           | -0.501              | 0.122  | 3.15×10 <sup>-2</sup>  | ↓         | Endothelial nitric oxide synthase (eNOS), vascular tone regulation                    |
| <i>Tlcd3b</i>                         | -0.195              | 0.046  | 2.04×10 <sup>-2</sup>  | ↓         | Membrane lipid metabolism                                                             |
| <b>Immune response</b>                |                     |        |                        |           |                                                                                       |
| <i>Gbp2b</i>                          | -5.296              | 0.695  | 5.71×10 <sup>-10</sup> | ↓         | Interferon-induced GTPase, innate immune response                                     |
| <i>Clec16a</i>                        | 0.418               | 0.069  | 8.28×10 <sup>-6</sup>  | ↑         | Autophagy and mitophagy regulation                                                    |
| <i>Adgre5</i>                         | -0.440              | 0.103  | 1.88×10 <sup>-2</sup>  | ↓         | Immune cell adhesion and migration                                                    |
| <b>Transcriptional regulation</b>     |                     |        |                        |           |                                                                                       |
| <i>Cbfa2t3</i>                        | -0.346              | 0.077  | 7.31×10 <sup>-3</sup>  | ↓         | Transcriptional corepressor, cell differentiation                                     |
| <i>Sox13</i>                          | -0.539              | 0.13   | 2.57×10 <sup>-2</sup>  | ↓         | Transcription factor, developmental regulation                                        |
| <i>Tiparp</i>                         | 0.467               | 0.088  | 3.10×10 <sup>-4</sup>  | ↑         | Mono-ADP-ribosyltransferase, transcriptional regulation                               |
| <b>Epilepsy / neurodevelopment</b>    |                     |        |                        |           |                                                                                       |
| <i>Cdkl5</i>                          | 0.674               | 0.103  | 4.89×10 <sup>-7</sup>  | ↑         | CDD causal gene                                                                       |
| <b>Other / limited annotation</b>     |                     |        |                        |           |                                                                                       |
| <i>Ermardl2</i>                       | 0.619               | 0.083  | 7.61×10 <sup>-10</sup> | ↑         | Poorly characterized                                                                  |
| <i>Ermardl1</i>                       | 4.552               | 0.991  | 6.04×10 <sup>-3</sup>  | ↑         | Poorly characterized                                                                  |
| <i>Ddx4</i>                           | 1.021               | 0.232  | 1.21×10 <sup>-2</sup>  | ↑         | RNA helicase; germline expression                                                     |
| <i>Gm5148</i>                         | -1.478              | 0.334  | 1.12×10 <sup>-2</sup>  | ↓         | Predicted gene, unknown function                                                      |
| <i>Gm47204</i>                        | -0.466              | 0.11   | 2.04×10 <sup>-2</sup>  | ↓         | Predicted gene, unknown function                                                      |
| <i>Gm26881</i>                        | -2.443              | 0.581  | 2.16×10 <sup>-2</sup>  | ↓         | Predicted gene, unknown function                                                      |
| <i>F730043M19Rik</i>                  | -0.477              | 0.095  | 1.35×10 <sup>-3</sup>  | ↓         | Uncharacterized gene                                                                  |
| <i>E230020A03Rik</i>                  | -1.257              | 0.274  | 6.04×10 <sup>-3</sup>  | ↓         | Uncharacterized gene                                                                  |
| <i>Pisd-ps1</i>                       | -1.329              | 0.256  | 5.75×10 <sup>-4</sup>  | ↓         | Poorly characterized                                                                  |
| <i>Eno1b</i>                          | 0.516               | 0.11   | 4.21×10 <sup>-3</sup>  | ↑         | Predicted gene, putative glycolytic function                                          |

|               |        |       |                       |   |                                                  |
|---------------|--------|-------|-----------------------|---|--------------------------------------------------|
| <i>Armh4</i>  | 0.238  | 0.049 | $2.69 \times 10^{-3}$ | ↑ | Partially characterized; transcriptional context |
| <i>Prune2</i> | -0.756 | 0.189 | $4.63 \times 10^{-2}$ | ↓ | Poorly characterized                             |

**Table S5. Functional classification of genes showing significant age × genotype interaction in the hippocampus of heterozygous *Cdk15* +/- female mice.** Genes were identified through RNA sequencing of hippocampal tissue from wild-type and heterozygous *Cdk15* +/- female mice at 3 and 12 months of age, followed by differential expression analysis using DESeq2 with age × genotype interaction term. Log<sub>2</sub> fold change (log<sub>2</sub>FC) values and their standard error (StdErr) represent the interaction effect, reflecting differences in log<sub>2</sub> fold changes across age between wild-type and heterozygous mice. A positive log<sub>2</sub>FC indicates that expression in heterozygous mice increases relative to wild-type with age (↑); a negative log<sub>2</sub>FC indicates that it decreases (↓). Genes are grouped by biological function. All genes with an adjusted *p*-value (*p*-adj) < 0.05 are shown.
