# Supplementary material
Source: Research Square preprint supplement (doi:10.21203/rs.3.rs-9792299/v1)
Supplement: Supplementary file 4 [file 63c08786fbd23b1a59bc5897.pdf]

| Gene                                   | log <sub>2</sub> FC | StdErr | p-adj                 | Direction | Biological function                                                                     |
|----------------------------------------|---------------------|--------|-----------------------|-----------|-----------------------------------------------------------------------------------------|
| <b>Interferon / immune signaling</b>   |                     |        |                       |           |                                                                                         |
| <i>Trim12a</i>                         | -1.437              | 0.229  | 3.70×10 <sup>-6</sup> | ↓         | Interferon-stimulated gene (ISG), innate immune response                                |
| <i>Trim30d</i>                         | -2.222              | 0.36   | 5.01×10 <sup>-6</sup> | ↓         | ISG, innate immune response                                                             |
| <i>Trim34a</i>                         | -1.522              | 0.311  | 3.69×10 <sup>-3</sup> | ↓         | ISG, antiviral response                                                                 |
| <i>Trim30a</i>                         | -1.542              | 0.38   | 4.91×10 <sup>-2</sup> | ↓         | ISG, immune regulation                                                                  |
| <i>Usp18</i>                           | -2.441              | 0.552  | 1.99×10 <sup>-2</sup> | ↓         | Negative regulator of IFN signaling                                                     |
| <i>Bst2</i>                            | -1.516              | 0.342  | 1.99×10 <sup>-2</sup> | ↓         | Interferon-induced antiviral protein                                                    |
| <i>Ifi2712a</i>                        | -3.261              | 0.743  | 2.01×10 <sup>-2</sup> | ↓         | ISG, interferon response                                                                |
| <i>Ifi204</i>                          | -4.053              | 0.941  | 2.49×10 <sup>-2</sup> | ↓         | Immune sensor, interferon pathway                                                       |
| <i>Nlrc5</i>                           | -1.781              | 0.411  | 2.38×10 <sup>-2</sup> | ↓         | Regulator of MHC-I expression                                                           |
| <i>Gzmk</i>                            | -3.542              | 0.839  | 3.27×10 <sup>-2</sup> | ↓         | Immune effector protease                                                                |
| <i>Tgtp1</i>                           | -1.701              | 0.419  | 4.91×10 <sup>-2</sup> | ↓         | IFN-induced GTPase                                                                      |
| <i>Parp12</i>                          | -0.627              | 0.153  | 4.70×10 <sup>-2</sup> | ↓         | Stress response / interferon pathway                                                    |
| <i>H2-Q6</i>                           | -2.855              | 0.638  | 1.94×10 <sup>-2</sup> | ↓         | MHC-I molecule                                                                          |
| <i>H2-Q7</i>                           | -2.511              | 0.572  | 2.01×10 <sup>-2</sup> | ↓         | MHC-I molecule                                                                          |
| <b>ECM and structural</b>              |                     |        |                       |           |                                                                                         |
| <i>Hspg2</i>                           | -0.506              | 0.122  | 4.14×10 <sup>-2</sup> | ↓         | Extracellular matrix, synaptic stability (perlecan)                                     |
| <i>Myo7a</i>                           | -0.823              | 0.183  | 1.94×10 <sup>-2</sup> | ↓         | Cytoskeletal organization                                                               |
| <b>Oxidative stress and metabolism</b> |                     |        |                       |           |                                                                                         |
| <i>Pon2</i>                            | -0.424              | 0.103  | 4.16×10 <sup>-2</sup> | ↓         | Oxidative stress regulation, mitochondrial protection                                   |
| <b>Epilepsy / neurodevelopment</b>     |                     |        |                       |           |                                                                                         |
| <i>Cdkl5</i>                           | 0.762               | 0.103  | 2.91×10 <sup>-9</sup> | ↑         | CDD causal gene                                                                         |
| <b>Other / limited annotation</b>      |                     |        |                       |           |                                                                                         |
| <i>Fibin</i>                           | 1.232               | 0.291  | 3.22×10 <sup>-2</sup> | ↑         | Secreted signaling molecule, embryonic development, limited CNS annotation              |
| <i>Ndfip2</i>                          | 0.283               | 0.062  | 1.59×10 <sup>-2</sup> | ↑         | E3 ubiquitin ligase adaptor, protein ubiquitination, trafficking and degradation        |
| <i>Ddx4</i>                            | 1.728               | 0.353  | 3.69×10 <sup>-3</sup> | ↑         | ATP-dependent RNA helicase                                                              |
| <i>Gm43720</i>                         | 5.776               | 1.392  | 4.14×10 <sup>-2</sup> | ↑         | Predicted gene, unknown function                                                        |
| <i>Ttc34</i>                           | -1.227              | 0.245  | 3.15×10 <sup>-3</sup> | ↓         | Tetratricopeptide repeat (TPR)-domain-containing scaffold protein; poorly characterized |

**Table S3. Functional classification of genes differentially expressed in the hippocampus of heterozygous *Cdkl5* +/- female mice at 3 months.** Genes were identified through RNA sequencing of hippocampal tissue from wild-type and *Cdkl5* +/- female mice at 3 months of age, followed by differential expression analysis using DESeq2. Log<sub>2</sub> fold change (log<sub>2</sub>FC) values and their standard error (StdErr) represent differential expression between genotypes at 3 months. Direction indicates upregulation (↑) or downregulation (↓) in heterozygous mice relative to wild-type controls. Genes are grouped by biological function. All genes with an adjusted *p*-value (*p*-adj) < 0.05 are shown. This classification highlights a dominant interferon-related transcriptional signature, with a coordinated downregulation of interferon-stimulated genes and MHC-I-related genes.
