# Supplementary material
Source: Research Square preprint supplement (doi:10.21203/rs.3.rs-9792299/v1)
Supplement: Supplementary file 6 [file 9eb6ec01bcefd5100b19ba20.pdf]

| Figure/Panel         | Statistical test           | Post-hoc test | Source of variation | Test statistic      | p-value |
|----------------------|----------------------------|---------------|---------------------|---------------------|---------|
| Fig.1B               | Kolmogorov-Smirnov test    | —             | —                   | $D = 0.109$         | 0.0634  |
| Fig.1C               | Kolmogorov-Smirnov test    | —             | —                   | $D = 0.0652$        | 0.332   |
| Fig.1E               | Kolmogorov-Smirnov test    | —             | —                   | $D = 0.170$         | 0.00224 |
| Fig.1F               | Kolmogorov-Smirnov test    | —             | —                   | $D = 0.192$         | <0.0001 |
| Fig.1H               | Kolmogorov-Smirnov test    | —             | —                   | $D = 0.172$         | <0.0001 |
| Fig.1I               | Kolmogorov-Smirnov test    | —             | —                   | $D = 0.193$         | 0.00289 |
| Fig.1K               | Kolmogorov-Smirnov test    | —             | —                   | $D = 0.143$         | 0.027   |
| Fig.1L               | Kolmogorov-Smirnov test    | —             | —                   | $D = 0.0900$        | 0.0689  |
| Fig.2A (Cortex)      | Two-way ANOVA              | Tukey         | Interaction         | $F(1, 16) = 0.5627$ | 0.4641  |
|                      |                            |               | Age                 | $F(1, 16) = 15.68$  | 0.0011  |
|                      |                            |               | Genotype            | $F(1, 16) = 1.366$  | 0.2596  |
| Fig.2A (Hippocampus) | Two-way ANOVA              | Tukey         | Interaction         | $F(1, 16) = 0.3952$ | 0.5385  |
|                      |                            |               | Age                 | $F(1, 16) = 15.21$  | 0.0013  |
|                      |                            |               | Genotype            | $F(1, 16) = 1.962$  | 0.1804  |
| Fig.2B (Cortex)      | Two-way ANOVA              | Tukey         | Interaction         | $F(1, 21) = 21.33$  | 0.0001  |
|                      |                            |               | Age                 | $F(1, 21) = 9.139$  | 0.0065  |
|                      |                            |               | Genotype            | $F(1, 21) = 2.714$  | 0.1143  |
| Fig.2B (Hippocampus) | Two-way ANOVA              | Tukey         | Interaction         | $F(1, 18) = 36.78$  | <0.0001 |
|                      |                            |               | Age                 | $F(1, 18) = 46.88$  | <0.0001 |
|                      |                            |               | Genotype            | $F(1, 18) = 1.017$  | 0.3267  |
| Fig.2D (Cortex)      | Two-way ANOVA              | Tukey         | Interaction         | $F(1, 16) = 93.79$  | <0.0001 |
|                      |                            |               | Age                 | $F(1, 16) = 3.965$  | 0.0638  |
|                      |                            |               | Genotype            | $F(1, 16) = 26.37$  | <0.0001 |
| Fig.2D (Hippocampus) | Two-way ANOVA              | Tukey         | Interaction         | $F(1, 16) = 74.27$  | <0.0001 |
|                      |                            |               | Age                 | $F(1, 16) = 201.8$  | <0.0001 |
|                      |                            |               | Genotype            | $F(1, 16) = 2.341$  | 0.1456  |
| Fig.3A (Cortex)      | Two-way ANOVA              | Tukey         | Interaction         | $F(1, 17) = 0.6808$ | 0.4207  |
|                      |                            |               | Age                 | $F(1, 17) = 706.7$  | <0.0001 |
|                      |                            |               | Genotype            | $F(1, 17) = 122.5$  | <0.0001 |
| Fig.3A (Hippocampus) | Two-way ANOVA              | Tukey         | Interaction         | $F(1, 17) = 1.085$  | 0.3121  |
|                      |                            |               | Age                 | $F(1, 17) = 292.6$  | <0.0001 |
|                      |                            |               | Genotype            | $F(1, 17) = 127.5$  | <0.0001 |
| Fig.3C (Cortex)      | Two-way ANOVA              | Tukey         | Interaction         | $F(1, 12) = 3.984$  | 0.0692  |
|                      |                            |               | Age                 | $F(1, 12) = 896.3$  | <0.0001 |
|                      |                            |               | Genotype            | $F(1, 12) = 1.230$  | 0.2892  |
| Fig.3C (Hippocampus) | Two-way ANOVA              | Tukey         | Interaction         | $F(1, 12) = 0.2069$ | 0.6573  |
|                      |                            |               | Age                 | $F(1, 12) = 517.2$  | <0.0001 |
|                      |                            |               | Genotype            | $F(1, 12) = 82.76$  | <0.0001 |
| Fig.4B (CDKL5)       | Unpaired two-tailed t-test | —             | —                   | $t(4) = 5.120$      | 0.0069  |
| Fig.4B (PSD-95)      | Unpaired two-tailed t-test | —             | —                   | $t(10) = 2.101$     | 0.0619  |
| Fig.4B (SYN)         | Unpaired two-tailed t-test | —             | —                   | $t(10) = 2.447$     | 0.0344  |
| Fig.4B (VGAT)        | Unpaired two-tailed t-test | —             | —                   | $t(10) = 1.899$     | 0.0867  |

| Figure/Panel                        | Statistical test           | Post-hoc test | Source of variation              | Test statistic                                                        | p-value                      |
|-------------------------------------|----------------------------|---------------|----------------------------------|-----------------------------------------------------------------------|------------------------------|
| Fig.4B (VGLUT1)                     | Unpaired two-tailed t-test | —             | —                                | $t(4) = 0.8254$                                                       | 0.4555                       |
| Fig.5A                              | Two-way ANOVA              | Tukey         | Interaction<br>Age<br>Genotype   | $F(1, 12) = 0.4730$<br>$F(1, 12) = 7.535$<br>$F(1, 12) = 39.53$       | 0.5047<br>0.0178<br><0.0001  |
| Fig.5C                              | Two-way ANOVA              | Tukey         | Interaction<br>Age<br>Genotype   | $F(1, 12) = 0.3885$<br>$F(1, 12) = 5.254$<br>$F(1, 12) = 35.56$       | 0.5447<br>0.0408<br><0.0001  |
| Fig.6C (Cortex)                     | Two-way ANOVA              | Tukey         | Interaction<br>Age<br>Genotype   | $F(1, 11) = 0.1673$<br>$F(1, 11) = 3.358$<br>$F(1, 11) = 0.8900$      | 0.6904<br>0.0941<br>0.3657   |
| Fig.6C (Hippocampus)                | Two-way ANOVA              | Tukey         | Interaction<br>Age<br>Genotype   | $F(1, 11) = 2.578$<br>$F(1, 11) = 5.354$<br>$F(1, 11) = 0.2085$       | 0.1367<br>0.041<br>0.6569    |
| Fig.6D (3M)                         | Two-way RM ANOVA           | Sidak         | Interaction<br>Layer<br>Genotype | $F(4, 20) = 1.286$<br>$F(1.607, 8.036) = 193.3$<br>$F(1, 5) = 0.2327$ | 0.3089<br><0.0001<br>0.6499  |
| Fig.6D (12M)                        | Two-way RM ANOVA           | Sidak         | Interaction<br>Layer<br>Genotype | $F(4, 24) = 2.481$<br>$F(2.216, 13.30) = 222.4$<br>$F(1, 6) = 0.7112$ | 0.0709<br><0.0001<br>0.4314  |
| Fig.7C (Cortex)                     | Two-way ANOVA              | Tukey         | Interaction<br>Age<br>Genotype   | $F(1, 12) = 3.782$<br>$F(1, 12) = 0.5924$<br>$F(1, 12) = 0.09479$     | 0.0756<br>0.4564<br>0.7635   |
| Fig.7C (Hippocampus)                | Two-way ANOVA              | Tukey         | Interaction<br>Age<br>Genotype   | $F(1, 12) = 0.7799$<br>$F(1, 12) = 9.179$<br>$F(1, 12) = 0.07544$     | 0.3945<br>0.0105<br>0.7883   |
| Fig.7D (3M)                         | Two-way RM ANOVA           | Sidak         | Interaction<br>Layer<br>Genotype | $F(4, 24) = 1.563$<br>$F(1.619, 9.714) = 33.31$<br>$F(1, 6) = 1.891$  | 0.2162<br><0.0001<br>0.2182  |
| Fig.7D (12M)                        | Two-way RM ANOVA           | Sidak         | Interaction<br>Layer<br>Genotype | $F(4, 24) = 3.059$<br>$F(2.530, 15.18) = 100.7$<br>$F(1, 6) = 1.659$  | 0.036<br><0.0001<br>0.2452   |
| Fig.8A (Body size - Cortex)         | Unpaired two-tailed t-test | —             | —                                | $t(18) = 4.624$                                                       | 0.0002                       |
| Fig.8A (Body size - Hippocampus)    | Unpaired two-tailed t-test | —             | —                                | $t(18) = 5.868$                                                       | <0.0001                      |
| Fig.8A (Cell Density - Cortex)      | Unpaired two-tailed t-test | —             | —                                | $t(18) = 4.962$                                                       | 0.0001                       |
| Fig.8A (Cell Density - Hippocampus) | Unpaired two-tailed t-test | —             | —                                | $t(18) = 2.054$                                                       | 0.0548                       |
| Fig.8B                              | Two-way ANOVA              | Tukey         | Interaction<br>Age<br>Genotype   | $F(1, 18) = 22.10$<br>$F(1, 18) = 28.68$<br>$F(1, 18) = 4.113$        | 0.0002<br><0.0001<br>0.0576  |
| Fig.8C                              | Unpaired two-tailed t-test | —             | —                                | $t(11) = 7.460$                                                       | <0.0001                      |
| Fig.8E                              | Two-way ANOVA              | Tukey         | Interaction<br>Age<br>Genotype   | $F(1, 12) = 6.937$<br>$F(1, 12) = 42.51$<br>$F(1, 12) = 91.04$        | 0.0218<br><0.0001<br><0.0001 |
| Fig.8F                              | Unpaired two-tailed t-test | —             | —                                | $t(7) = 3.789$                                                        | 0.0068                       |
| Fig.10B                             | Two-way ANOVA              | Tukey         | Interaction<br>Age<br>Genotype   | $F(1, 28) = 83.44$<br>$F(1, 28) = 1.548$<br>$F(1, 28) = 13.93$        | <0.0001<br>0.2238<br>0.0009  |
| Fig.10C                             | Two-way ANOVA              | Tukey         | Interaction<br>Age<br>Genotype   | $F(1, 28) = 10.36$<br>$F(1, 28) = 0.03946$<br>$F(1, 28) = 3.487$      | 0.0033<br>0.844<br>0.0724    |

| Figure/Panel                       | Statistical test | Post-hoc test | Source of variation | Test statistic            | p-value |
|------------------------------------|------------------|---------------|---------------------|---------------------------|---------|
| Supplementary Fig.1A               | Two-way ANOVA    | Sidak         | Interaction         | $F(1, 13) = 1.089$        | 0.3157  |
|                                    |                  |               | Sex                 | $F(1, 13) = 5.564$        | 0.0346  |
|                                    |                  |               | Genotype            | $F(1, 13) = 46.96$        | <0.0001 |
| Supplementary Fig.1B               | Two-way ANOVA    | Sidak         | Interaction         | $F(1, 13) = 5.241$        | 0.0394  |
|                                    |                  |               | Sex                 | $F(1, 13) = 21.16$        | 0.0005  |
|                                    |                  |               | Genotype            | $F(1, 13) = 333.1$        | <0.0001 |
| Supplementary Fig.2A (+/+)         | Two-way RM ANOVA | Sidak         | Interaction         | $F(4, 24) = 0.6856$       | 0.6089  |
|                                    |                  |               | Layer               | $F(1.585, 9.512) = 85.62$ | <0.0001 |
|                                    |                  |               | Genotype            | $F(1, 6) = 0.2524$        | 0.6333  |
| Supplementary Fig.2A (+/-)         | Two-way RM ANOVA | Sidak         | Interaction         | $F(4, 24) = 4.715$        | 0.006   |
|                                    |                  |               | Layer               | $F(2.377, 14.26) = 295.4$ | <0.0001 |
|                                    |                  |               | Genotype            | $F(1, 6) = 2.701$         | 0.1514  |
| Supplementary Fig.2B (+/+)         | Two-way RM ANOVA | Sidak         | Interaction         | $F(4, 24) = 0.5951$       | 0.6696  |
|                                    |                  |               | Layer               | $F(1.720, 10.32) = 37.25$ | <0.0001 |
|                                    |                  |               | Genotype            | $F(1, 6) = 0.2387$        | 0.6425  |
| Supplementary Fig.2B (+/-)         | Two-way RM ANOVA | Sidak         | Interaction         | $F(4, 24) = 3.271$        | 0.0283  |
|                                    |                  |               | Layer               | $F(2.303, 13.82) = 83.52$ | <0.0001 |
|                                    |                  |               | Genotype            | $F(1, 6) = 12.03$         | 0.0133  |
| Supplementary Fig.2D               | Two-way RM ANOVA | Sidak         | Interaction         | $F(1, 6) = 2.280$         | 0.1818  |
|                                    |                  |               | Brain Region        | $F(1, 6) = 5.722$         | 0.0539  |
|                                    |                  |               | Genotype            | $F(1, 6) = 0.4211$        | 0.5404  |
| Supplementary Fig.2E               | Two-way RM ANOVA | Sidak         | Interaction         | $F(4, 24) = 1.790$        | 0.1638  |
|                                    |                  |               | Layer               | $F(1.997, 11.98) = 94.85$ | <0.0001 |
|                                    |                  |               | Genotype            | $F(1, 6) = 0.7053$        | 0.4332  |
| Supplementary Fig.3A (Cortex)      | Two-way ANOVA    | Tukey         | Interaction         | $F(1, 31) = 8.909$        | 0.0055  |
|                                    |                  |               | Age                 | $F(1, 31) = 24.06$        | <0.0001 |
|                                    |                  |               | Genotype            | $F(1, 31) = 48.43$        | <0.0001 |
| Supplementary Fig.3A (Hippocampus) | Two-way ANOVA    | Tukey         | Interaction         | $F(1, 31) = 15.77$        | 0.0004  |
|                                    |                  |               | Age                 | $F(1, 31) = 14.12$        | 0.0007  |
|                                    |                  |               | Genotype            | $F(1, 31) = 63.97$        | <0.0001 |
| Supplementary Fig.3B (Cortex)      | Two-way ANOVA    | Tukey         | Interaction         | $F(1, 31) = 9.309$        | 0.0046  |
|                                    |                  |               | Age                 | $F(1, 31) = 28.76$        | <0.0001 |
|                                    |                  |               | Genotype            | $F(1, 31) = 9.508$        | 0.0043  |
| Supplementary Fig.3B (Hippocampus) | Two-way ANOVA    | Tukey         | Interaction         | $F(1, 31) = 1.399$        | 0.2459  |
|                                    |                  |               | Age                 | $F(1, 31) = 38.27$        | <0.0001 |
|                                    |                  |               | Genotype            | $F(1, 31) = 11.12$        | 0.0022  |

**Table S2. Summary of statistical analyses.** Test statistics are reported as *D* for the Kolmogorov-Smirnov test, *F* (DFn, DFd) for ANOVA, and *t* (df) for *t*-tests, where DFn and DFd indicate the numerator and denominator degrees of freedom, respectively, and df indicates the degrees of freedom. Abbreviations: RM = repeated measures.
